# Supplementary material for: CENP-T regulates both the G2/M transition and anaphase entry by acting through CDH1 in meiotic oocytes
Source: Oxford University Press journal article supplement (doi:10.1242/jcs.238105), 2020-01-21
Supplement: jcs238105supp.pdf [file jcs238105supp.pdf]

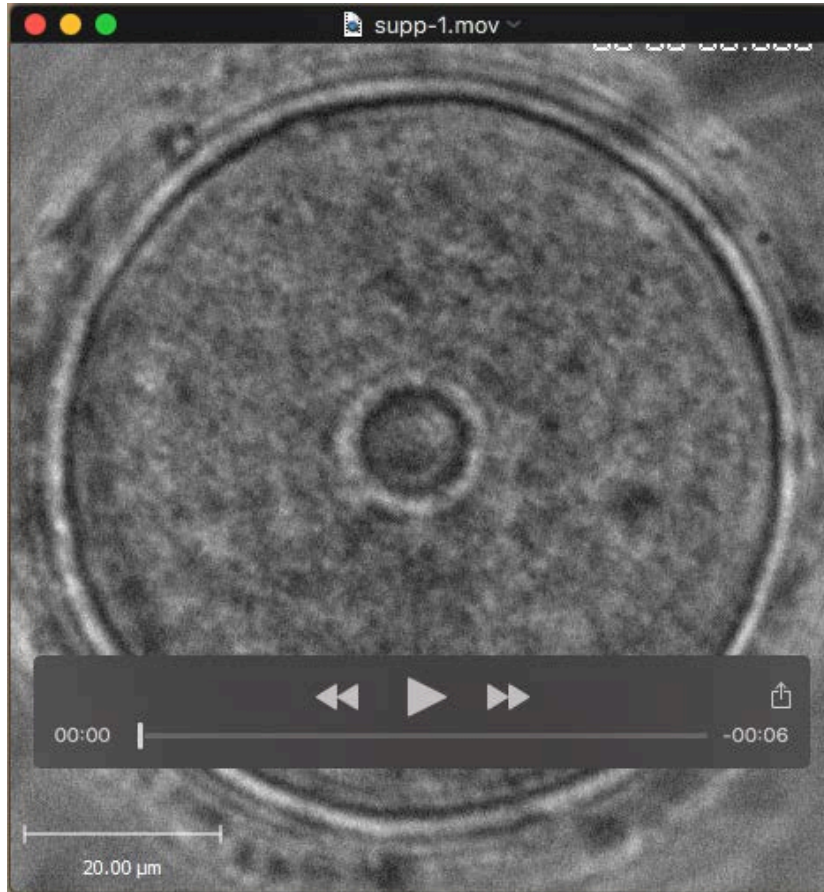

Movie 1. PB1 extrusion for control oocytes (a supplemental movie for Figure 5C)

Time-lapse live imaging experiment was used to analyze the timing of PB1 extrusion. In control oocytes, polar body extrusion was found at 11h (9 h post GVBD)

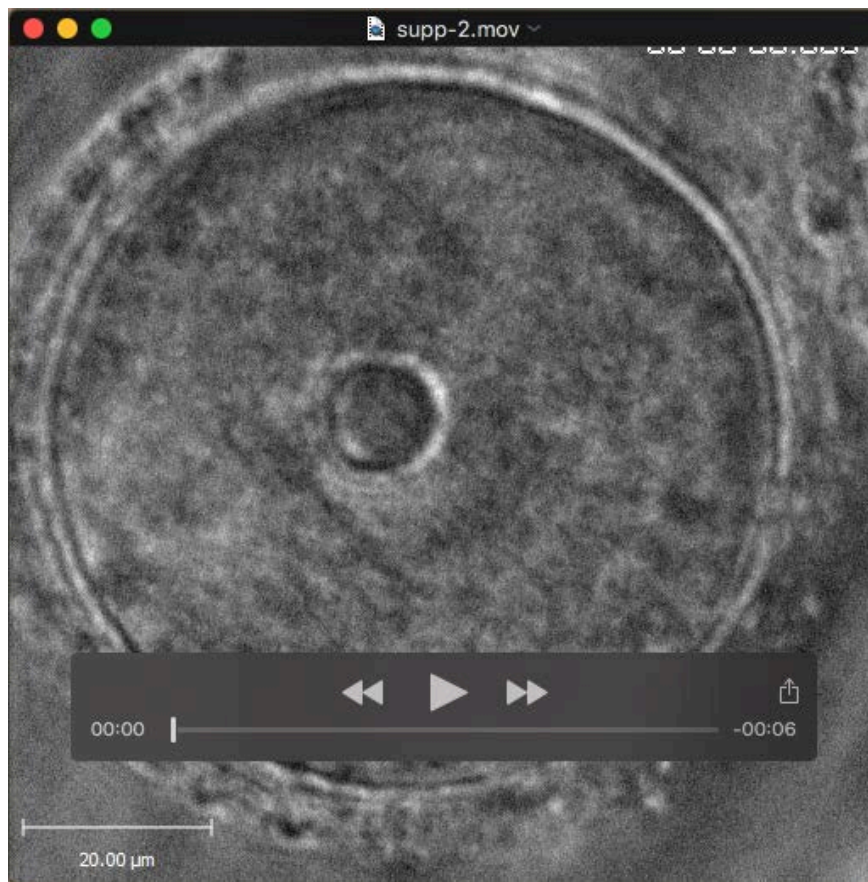

Movie 2. PB1 extrusion for CENP-T-mRNA injected oocytes (a supplemental movie for Figure 5C)

Time-lapse live imaging experiment was used to analyze the timing of PB1 extrusion. In control oocytes, polar body extrusion was found at 8.5h (6.5 h post GVBD), which is much earlier than that of control oocytes.
